# Supplementary material for: Health literacy and cumulative social disadvantage are associated with survival and transplant in patients with hepatocellular carcinoma: a prospective study
Source: PubMed Central journal article supplement — BMJ Open Gastroenterol. 2024 Oct 2;11(1):e001537. doi: 10.1136/bmjgast-2024-001537 (PMC11448155; doi:10.1136/bmjgast-2024-001537), 2024-10-02
Supplement: bmjgast-11-1-s001.pdf [file bmjgast-11-1-s001.pdf]

**Supplemental Table 1A. Cumulative Social Disadvantage and Components by Race and Ethnicity  
(including expanded race and ethnicity categories)**

|                                           | Asian or Pacific Islander (N=1) | Black (N=20) | Native American or American Indian (N=1) | Other (N=2) | White (N=115) | Total (N=139) |
|-------------------------------------------|---------------------------------|--------------|------------------------------------------|-------------|---------------|---------------|
| <b>Education Attainment</b>               |                                 |              |                                          |             |               |               |
| High School Degree or Higher              | 1 (100.0%)                      | 13 (65.0%)   | 1 (100.0%)                               | 1 (50.0%)   | 99 (86.1%)    | 115 (82.7%)   |
| Less than High School                     | 0 (0.0%)                        | 7 (35.0%)    | 0 (0.0%)                                 | 1 (50.0%)   | 16 (13.9%)    | 24 (17.3%)    |
| <b>BHLS</b>                               |                                 |              |                                          |             |               |               |
| Q2 through Q4                             | 1 (100.0%)                      | 15 (75.0%)   | 1 (100.0%)                               | 0 (0.0%)    | 93 (80.9%)    | 110 (79.7%)   |
| Q1 (<7)                                   | 0 (0.0%)                        | 5 (25.0%)    | 0 (0.0%)                                 | 1 (100.0%)  | 22 (19.1%)    | 28 (20.3%)    |
| N-Miss                                    | 0                               | 0            | 0                                        | 1           | 0             | 1             |
| <b>Disease Specific Knowledge</b>         |                                 |              |                                          |             |               |               |
| Correctly Self Reported Disease           | 1 (100.0%)                      | 8 (50.0%)    | 1 (100.0%)                               | 1 (50.0%)   | 49 (51.0%)    | 60 (51.7%)    |
| Incorrectly Self Reported Disease         | 0 (0.0%)                        | 8 (50.0%)    | 0 (0.0%)                                 | 1 (50.0%)   | 47 (49.0%)    | 56 (48.3%)    |
| N-Miss                                    | 0                               | 4            | 0                                        | 0           | 19            | 23            |
| <b>Employment</b>                         |                                 |              |                                          |             |               |               |
| Employed/Retired/Homemaker/Refused        | 1 (100.0%)                      | 9 (45.0%)    | 0 (0.0%)                                 | 2 (100.0%)  | 70 (61.4%)    | 82 (59.4%)    |
| Unemployed/SSI/Disability                 | 0 (0.0%)                        | 11 (55.0%)   | 1 (100.0%)                               | 0 (0.0%)    | 44 (38.6%)    | 56 (40.6%)    |
| N-Miss                                    | 0                               | 0            | 0                                        | 0           | 1             | 1             |
| <b>Income</b>                             |                                 |              |                                          |             |               |               |
| \$15K or Greater                          | 1 (100.0%)                      | 9 (47.4%)    | 1 (100.0%)                               | 2 (100.0%)  | 89 (81.7%)    | 102 (77.3%)   |
| Less than \$15K                           | 0 (0.0%)                        | 10 (52.6%)   | 0 (0.0%)                                 | 0 (0.0%)    | 20 (18.3%)    | 30 (22.7%)    |
| N-Miss                                    | 0                               | 1            | 0                                        | 0           | 6             | 7             |
| <b>Income Adequacy</b>                    |                                 |              |                                          |             |               |               |
| Enough or Little Spare Money              | 1 (100.0%)                      | 12 (66.7%)   | 0 (0.0%)                                 | 2 (100.0%)  | 72 (67.3%)    | 87 (67.4%)    |
| Difficulty Paying Bills or No Spare Money | 0 (0.0%)                        | 6 (33.3%)    | 1 (100.0%)                               | 0 (0.0%)    | 35 (32.7%)    | 42 (32.6%)    |
| N-Miss                                    | 0                               | 2            | 0                                        | 0           | 8             | 10            |
| <b>Transportation</b>                     |                                 |              |                                          |             |               |               |
| No Transportation Issues                  | 1 (100.0%)                      | 17 (85.0%)   | 1 (100.0%)                               | 2 (100.0%)  | 107 (93.0%)   | 128 (92.1%)   |
| Transportation Issues                     | 0 (0.0%)                        | 3 (15.0%)    | 0 (0.0%)                                 | 0 (0.0%)    | 8 (7.0%)      | 11 (7.9%)     |
| <b>Neighborhood Poverty</b>               |                                 |              |                                          |             |               |               |
| SDI Q1 through Q3                         | 1 (100.0%)                      | 6 (31.6%)    | 1 (100.0%)                               | 2 (100.0%)  | 94 (82.5%)    | 104 (75.9%)   |
| SDI Q4 (>85)                              | 0 (0.0%)                        | 13 (68.4%)   | 0 (0.0%)                                 | 0 (0.0%)    | 20 (17.5%)    | 33 (24.1%)    |
| N-Miss                                    | 0                               | 1            | 0                                        | 0           | 1             | 2             |
| <b>Insurance</b>                          |                                 |              |                                          |             |               |               |
| Medicare/Private                          | 1 (100.0%)                      | 8 (42.1%)    | 1 (100.0%)                               | 2 (100.0%)  | 77 (67.0%)    | 89 (64.5%)    |
| Medicaid                                  | 0 (0.0%)                        | 11 (57.9%)   | 0 (0.0%)                                 | 0 (0.0%)    | 38 (33.0%)    | 49 (35.5%)    |
| N-Miss                                    | 0                               | 1            | 0                                        | 0           | 0             | 1             |
| <b>Social Support</b>                     |                                 |              |                                          |             |               |               |
| PROMIS ISS Q2 through Q4                  | 1 (100.0%)                      | 13 (65.0%)   | 0 (0.0%)                                 | 2 (100.0%)  | 90 (80.4%)    | 106 (77.9%)   |

|                                                                                                                                                      | Asian or Pacific Islander (N=1) | Black (N=20)   | Native American or American Indian (N=1) | Other (N=2)    | White (N=115)  | Total (N=139)  |
|------------------------------------------------------------------------------------------------------------------------------------------------------|---------------------------------|----------------|------------------------------------------|----------------|----------------|----------------|
| PROMIS ISS Q1 (<30)                                                                                                                                  | 0 (0.0%)                        | 7 (35.0%)      | 1 (100.0%)                               | 0 (0.0%)       | 22 (19.6%)     | 30 (22.1%)     |
| N-Miss                                                                                                                                               | 0                               | 0              | 0                                        | 0              | 3              | 3              |
| <b>Marital Status</b>                                                                                                                                |                                 |                |                                          |                |                |                |
| Married                                                                                                                                              | 1 (100.0%)                      | 4 (20.0%)      | 0 (0.0%)                                 | 2 (100.0%)     | 68 (59.1%)     | 75 (54.0%)     |
| Not Married                                                                                                                                          | 0 (0.0%)                        | 16 (80.0%)     | 1 (100.0%)                               | 0 (0.0%)       | 47 (40.9%)     | 64 (46.0%)     |
| <b>Adherence</b>                                                                                                                                     |                                 |                |                                          |                |                |                |
| Adherence Sum Q2 through Q4                                                                                                                          | 1 (100.0%)                      | 15 (75.0%)     | 1 (100.0%)                               | 2 (100.0%)     | 87 (77.7%)     | 106 (77.9%)    |
| Adherence Sum Q1 (<14)                                                                                                                               | 0 (0.0%)                        | 5 (25.0%)      | 0 (0.0%)                                 | 0 (0.0%)       | 25 (22.3%)     | 30 (22.1%)     |
| N-Miss                                                                                                                                               | 0                               | 0              | 0                                        | 0              | 3              | 3              |
| <b>Substance Use</b>                                                                                                                                 |                                 |                |                                          |                |                |                |
| No Recent Alcohol Use                                                                                                                                | 1 (100.0%)                      | 13 (65.0%)     | 1 (100.0%)                               | 2 (100.0%)     | 91 (79.8%)     | 108 (78.3%)    |
| Alcohol Use in Last 90 Days                                                                                                                          | 0 (0.0%)                        | 7 (35.0%)      | 0 (0.0%)                                 | 0 (0.0%)       | 23 (20.2%)     | 30 (21.7%)     |
| N-Miss                                                                                                                                               | 0                               | 0              | 0                                        | 0              | 1              | 1              |
| <b>Total Cumulative Burden</b>                                                                                                                       |                                 |                |                                          |                |                |                |
| Mean (SD)                                                                                                                                            | 0.0 (NA)                        | 5.4 (2.5)      | 4.0 (NA)                                 | 1.5 (0.7)      | 3.2 (2.1)      | 3.5 (2.3)      |
| Median (Q1, Q3)                                                                                                                                      | 0.0 (0.0, 0.0)                  | 6.0 (3.8, 7.2) | 4.0 (4.0, 4.0)                           | 1.5 (1.2, 1.8) | 3.0 (2.0, 4.5) | 3.0 (2.0, 5.0) |
| Range                                                                                                                                                | 0.0 - 0.0                       | 2.0 - 10.0     | 4.0 - 4.0                                | 1.0 - 2.0      | 0.0 - 11.0     | 0.0 - 11.0     |
| Abbreviations: Social Deprivation Index (SDI), Patient-Reported Outcomes Measurement Information System (PROMIS), Brief health literacy score (BHLS) |                                 |                |                                          |                |                |                |

Supplemental Table 1B. Cumulative Social Disadvantage and Components in Black vs. White Patients

|                                           | Black (N=20) | White (N=115) | Total (N=135) | p-value |
|-------------------------------------------|--------------|---------------|---------------|---------|
| <b>Education Attainment</b>               |              |               |               | 0.046*  |
| High School Degree or Higher              | 13 (65.0%)   | 99 (86.1%)    | 112 (83.0%)   |         |
| Less than High School                     | 7 (35.0%)    | 16 (13.9%)    | 23 (17.0%)    |         |
| <b>BHLS</b>                               |              |               |               | 0.55    |
| Q2 through Q4                             | 15 (75.0%)   | 93 (80.9%)    | 108 (80.0%)   |         |
| Q1 (<7)                                   | 5 (25.0%)    | 22 (19.1%)    | 27 (20.0%)    |         |
| <b>Disease Specific Knowledge</b>         |              |               |               | 0.94    |
| Correctly Self Reported Disease           | 8 (50.0%)    | 49 (51.0%)    | 57 (50.9%)    |         |
| Incorrectly Self Reported Disease         | 8 (50.0%)    | 47 (49.0%)    | 55 (49.1%)    |         |
| N-Miss                                    | 4            | 19            | 23            |         |
| <b>Employment</b>                         |              |               |               | 0.17    |
| Employed/Retired/Homemaker/Refused        | 9 (45.0%)    | 70 (61.4%)    | 79 (59.0%)    |         |
| Unemployed/SSI/Disability                 | 11 (55.0%)   | 44 (38.6%)    | 55 (41.0%)    |         |
| N-Miss                                    | 0            | 1             | 1             |         |
| <b>Income</b>                             |              |               |               | 0.003*  |
| \$15K or Greater                          | 9 (47.4%)    | 89 (81.7%)    | 98 (76.6%)    |         |
| Less than \$15K                           | 10 (52.6%)   | 20 (18.3%)    | 30 (23.4%)    |         |
| N-Miss                                    | 1            | 6             | 7             |         |
| <b>Income Adequacy</b>                    |              |               |               | 0.96    |
| Enough or Little Spare Money              | 12 (66.7%)   | 72 (67.3%)    | 84 (67.2%)    |         |
| Difficulty Paying Bills or No Spare Money | 6 (33.3%)    | 35 (32.7%)    | 41 (32.8%)    |         |
| N-Miss                                    | 2            | 8             | 10            |         |
| <b>Transportation</b>                     |              |               |               | 0.21    |
| No Transportation Issues                  | 17 (85.0%)   | 107 (93.0%)   | 124 (91.9%)   |         |
| Transportation Issues                     | 3 (15.0%)    | 8 (7.0%)      | 11 (8.1%)     |         |
| <b>Neighborhood Poverty</b>               |              |               |               | <0.001* |
| SDI Q1 through Q3                         | 6 (31.6%)    | 94 (82.5%)    | 100 (75.2%)   |         |
| SDI Q4 (>85)                              | 13 (68.4%)   | 20 (17.5%)    | 33 (24.8%)    |         |
| N-Miss                                    | 1            | 1             | 2             |         |
| <b>Insurance</b>                          |              |               |               | 0.04*   |
| Medicare/Private                          | 8 (42.1%)    | 77 (67.0%)    | 85 (63.4%)    |         |
| Medicaid                                  | 11 (57.9%)   | 38 (33.0%)    | 49 (36.6%)    |         |
| N-Miss                                    | 1            | 0             | 1             |         |
| <b>Social Support</b>                     |              |               |               | 0.15    |
| PROMIS ISS Q2 through Q4                  | 13 (65.0%)   | 90 (80.4%)    | 103 (78.0%)   |         |
| PROMIS ISS Q1 (<30)                       | 7 (35.0%)    | 22 (19.6%)    | 29 (22.0%)    |         |
| N-Miss                                    | 0            | 3             | 3             |         |
| <b>Marital Status</b>                     |              |               |               | 0.001*  |
| Married                                   | 4 (20.0%)    | 68 (59.1%)    | 72 (53.3%)    |         |
| Not Married                               | 16 (80.0%)   | 47 (40.9%)    | 63 (46.7%)    |         |
| <b>Adherence</b>                          |              |               |               | 0.78    |
| Adherence Sum Q2 through Q4               | 15 (75.0%)   | 87 (77.7%)    | 102 (77.3%)   |         |

|                                                                                                                                                      | <b>Black (N=20)</b> | <b>White (N=115)</b> | <b>Total (N=135)</b> | <b>p-value</b> |
|------------------------------------------------------------------------------------------------------------------------------------------------------|---------------------|----------------------|----------------------|----------------|
| Adherence Sum Q1 (<14)                                                                                                                               | 5 (25.0%)           | 25 (22.3%)           | 30 (22.7%)           |                |
| N-Miss                                                                                                                                               | 0                   | 3                    | 3                    |                |
| <b>Substance Use</b>                                                                                                                                 |                     |                      |                      | 0.15           |
| No Recent Alcohol Use                                                                                                                                | 13 (65.0%)          | 91 (79.8%)           | 104 (77.6%)          |                |
| Alcohol Use in Last 90 Days                                                                                                                          | 7 (35.0%)           | 23 (20.2%)           | 30 (22.4%)           |                |
| N-Miss                                                                                                                                               | 0                   | 1                    | 1                    |                |
| <b>Total Cumulative Burden</b>                                                                                                                       |                     |                      |                      | <0.001*        |
| Mean (SD)                                                                                                                                            | 5.4 (2.5)           | 3.2 (2.1)            | 3.5 (2.3)            |                |
| Median (Q1, Q3)                                                                                                                                      | 6.0 (3.8, 7.2)      | 3.0 (2.0, 4.5)       | 3.0 (2.0, 5.0)       |                |
| Range                                                                                                                                                | 2.0 - 10.0          | 0.0 - 11.0           | 0.0 - 11.0           |                |
| Abbreviations: Social Deprivation Index (SDI), Patient-Reported Outcomes Measurement Information System (PROMIS), Brief health literacy score (BHLS) |                     |                      |                      |                |
| *p-value<0.05                                                                                                                                        |                     |                      |                      |                |

Supplemental Table 2. CSD and Components in Men vs Women

|                                           | Women<br>(N=36) | Men<br>(N=102) | Total (N=138) | p-value |
|-------------------------------------------|-----------------|----------------|---------------|---------|
| <b>Education Attainment</b>               |                 |                |               | 0.52    |
| High School Degree or Higher              | 31 (86.1%)      | 83 (81.4%)     | 114 (82.6%)   |         |
| Less than High School                     | 5 (13.9%)       | 19 (18.6%)     | 24 (17.4%)    |         |
| <b>BHLS</b>                               |                 |                |               | 0.26    |
| Q2 through Q4                             | 31 (86.1%)      | 78 (77.2%)     | 109 (79.6%)   |         |
| Q1 (<7)                                   | 5 (13.9%)       | 23 (22.8%)     | 28 (20.4%)    |         |
| N-Miss                                    | 0               | 1              | 1             |         |
| <b>Disease Specific Knowledge</b>         |                 |                |               | 0.53    |
| Correctly Self Reported Disease           | 18 (58.1%)      | 42 (50.0%)     | 60 (52.2%)    |         |
| Incorrectly Self Reported Disease         | 13 (41.9%)      | 42 (50.0%)     | 55 (47.8%)    |         |
| N-Miss                                    | 5               | 18             | 23            |         |
| <b>Employment</b>                         |                 |                |               | 0.78    |
| Employed/Retired/Homemaker/Refused        | 22 (61.1%)      | 59 (58.4%)     | 81 (59.1%)    |         |
| Unemployed/SSI/Disability                 | 14 (38.9%)      | 42 (41.6%)     | 56 (40.9%)    |         |
| N-Miss                                    | 0               | 1              | 1             |         |
| <b>Income</b>                             |                 |                |               | 0.20    |
| \$15K or Greater                          | 22 (68.8%)      | 79 (79.8%)     | 101 (77.1%)   |         |
| Less than \$15K                           | 10 (31.2%)      | 20 (20.2%)     | 30 (22.9%)    |         |
| N-Miss                                    | 4               | 3              | 7             |         |
| <b>Income Adequacy</b>                    |                 |                |               | 0.18    |
| Enough or Little Spare Money              | 20 (58.8%)      | 67 (71.3%)     | 87 (68.0%)    |         |
| Difficulty Paying Bills or No Spare Money | 14 (41.2%)      | 27 (28.7%)     | 41 (32.0%)    |         |
| N-Miss                                    | 2               | 8              | 10            |         |
| <b>Transportation</b>                     |                 |                |               | 1.00    |
| No Transportation Issues                  | 34 (94.4%)      | 94 (92.2%)     | 128 (92.8%)   |         |
| Transportation Issues                     | 2 (5.6%)        | 8 (7.8%)       | 10 (7.2%)     |         |
| <b>Neighborhood Poverty</b>               |                 |                |               | 0.42    |
| SDI Q1 through Q3                         | 25 (71.4%)      | 79 (78.2%)     | 104 (76.5%)   |         |
| SDI Q4 (>85)                              | 10 (28.6%)      | 22 (21.8%)     | 32 (23.5%)    |         |
| N-Miss                                    | 1               | 1              | 2             |         |
| <b>Insurance</b>                          |                 |                |               | 0.33    |
| Medicare/Private                          | 21 (58.3%)      | 68 (67.3%)     | 89 (65.0%)    |         |
| Medicaid                                  | 15 (41.7%)      | 33 (32.7%)     | 48 (35.0%)    |         |
| N-Miss                                    | 0               | 1              | 1             |         |
| <b>Social Support</b>                     |                 |                |               | 0.64    |
| PROMIS ISS Q2 through Q4                  | 29 (80.6%)      | 76 (76.8%)     | 105 (77.8%)   |         |
| PROMIS ISS Q1 (<30)                       | 7 (19.4%)       | 23 (23.2%)     | 30 (22.2%)    |         |
| N-Miss                                    | 0               | 3              | 3             |         |
| <b>Marital Status</b>                     |                 |                |               | 0.32    |
| Married                                   | 17 (47.2%)      | 58 (56.9%)     | 75 (54.3%)    |         |
| Not Married                               | 19 (52.8%)      | 44 (43.1%)     | 63 (45.7%)    |         |
| <b>Adherence</b>                          |                 |                |               | 0.90    |

|                                                                                                                                                      | <b>Women<br/>(N=36)</b> | <b>Men<br/>(N=102)</b> | <b>Total (N=138)</b> | <b>p-value</b> |
|------------------------------------------------------------------------------------------------------------------------------------------------------|-------------------------|------------------------|----------------------|----------------|
| Adherence Sum Q2 through Q4                                                                                                                          | 28 (77.8%)              | 78 (78.8%)             | 106 (78.5%)          |                |
| Adherence Sum Q1 (<14)                                                                                                                               | 8 (22.2%)               | 21 (21.2%)             | 29 (21.5%)           |                |
| N-Miss                                                                                                                                               | 0                       | 3                      | 3                    |                |
| <b>Substance Use</b>                                                                                                                                 |                         |                        |                      | <b>0.38</b>    |
| No Recent Alcohol Use                                                                                                                                | 30 (83.3%)              | 77 (76.2%)             | 107 (78.1%)          |                |
| Alcohol Use in Last 90 Days                                                                                                                          | 6 (16.7%)               | 24 (23.8%)             | 30 (21.9%)           |                |
| N-Miss                                                                                                                                               | 0                       | 1                      | 1                    |                |
| <b>Total Cumulative Burden</b>                                                                                                                       |                         |                        |                      | <b>0.75</b>    |
| Mean (SD)                                                                                                                                            | 3.6 (2.0)               | 3.4 (2.4)              | 3.4 (2.3)            |                |
| Median (Q1, Q3)                                                                                                                                      | 3.0 (2.0, 5.0)          | 3.0 (2.0, 5.0)         | 3.0 (2.0, 5.0)       |                |
| Range                                                                                                                                                | 0.0 – 8.0               | 0.0 – 11.0             | 0.0 – 11.0           |                |
| Abbreviations: Social Deprivation Index (SDI), Patient-Reported Outcomes Measurement Information System (PROMIS), Brief health literacy score (BHLS) |                         |                        |                      |                |

**Supplemental Table 3A. Cumulative Social Disadvantage by Liver Etiology (including unknown/and other category)**

|                                           | <b>ALD (N=20)</b> | <b>Hepatitis C (N=59)</b> | <b>MASLD (N=43)</b> | <b>Unknown/Other (N=5)</b> | <b>Total (N=127)</b> |
|-------------------------------------------|-------------------|---------------------------|---------------------|----------------------------|----------------------|
| <b>Education Attainment</b>               |                   |                           |                     |                            |                      |
| High School Degree or Higher              | 17 (85.0%)        | 46 (78.0%)                | 38 (88.4%)          | 3 (60.0%)                  | 104 (81.9%)          |
| Less than High School                     | 3 (15.0%)         | 13 (22.0%)                | 5 (11.6%)           | 2 (40.0%)                  | 23 (18.1%)           |
| <b>BHLS</b>                               |                   |                           |                     |                            |                      |
| Q2 through Q4                             | 17 (89.5%)        | 45 (76.3%)                | 32 (74.4%)          | 5 (100.0%)                 | 99 (78.6%)           |
| Q1 (<7)                                   | 2 (10.5%)         | 14 (23.7%)                | 11 (25.6%)          | 0 (0.0%)                   | 27 (21.4%)           |
| N-Miss                                    | 1                 | 0                         | 0                   | 0                          | 1                    |
| <b>Disease Specific Knowledge</b>         |                   |                           |                     |                            |                      |
| Correctly Self Reported Disease           | 0 (0.0%)          | 35 (66.0%)                | 24 (61.5%)          | 1 (25.0%)                  | 60 (54.1%)           |
| Incorrectly Self Reported Disease         | 15 (100.0%)       | 18 (34.0%)                | 15 (38.5%)          | 3 (75.0%)                  | 51 (45.9%)           |
| N-Miss                                    | 5                 | 6                         | 4                   | 1                          | 16                   |
| <b>Employment</b>                         |                   |                           |                     |                            |                      |
| Employed/Retired/Homemaker                | 14 (73.7%)        | 24 (40.7%)                | 31 (72.1%)          | 3 (60.0%)                  | 72 (57.1%)           |
| Unemployed/SSI/Disability                 | 5 (26.3%)         | 35 (59.3%)                | 12 (27.9%)          | 2 (40.0%)                  | 54 (42.9%)           |
| N-Miss                                    | 1                 | 0                         | 0                   | 0                          | 1                    |
| <b>Income</b>                             |                   |                           |                     |                            |                      |
| \$15K or Greater                          | 15 (88.2%)        | 33 (58.9%)                | 38 (90.5%)          | 5 (100.0%)                 | 91 (75.8%)           |
| Less than \$15K                           | 2 (11.8%)         | 23 (41.1%)                | 4 (9.5%)            | 0 (0.0%)                   | 29 (24.2%)           |
| N-Miss                                    | 3                 | 3                         | 1                   | 0                          | 7                    |
| <b>Income Adequacy</b>                    |                   |                           |                     |                            |                      |
| Enough or Little Spare Money              | 15 (83.3%)        | 31 (56.4%)                | 27 (69.2%)          | 3 (60.0%)                  | 76 (65.0%)           |
| Difficulty Paying Bills or No Spare Money | 3 (16.7%)         | 24 (43.6%)                | 12 (30.8%)          | 2 (40.0%)                  | 41 (35.0%)           |
| N-Miss                                    | 2                 | 4                         | 4                   | 0                          | 10                   |
| <b>Transportation</b>                     |                   |                           |                     |                            |                      |
| No Transportation Issues                  | 17 (85.0%)        | 53 (89.8%)                | 43 (100.0%)         | 5 (100.0%)                 | 118 (92.9%)          |
| Transportation Issues                     | 3 (15.0%)         | 6 (10.2%)                 | 0 (0.0%)            | 0 (0.0%)                   | 9 (7.1%)             |
| <b>Neighborhood Poverty</b>               |                   |                           |                     |                            |                      |
| SDI Q1 through Q3                         | 15 (78.9%)        | 35 (60.3%)                | 40 (93.0%)          | 5 (100.0%)                 | 95 (76.0%)           |
| SDI Q4 (>85)                              | 4 (21.1%)         | 23 (39.7%)                | 3 (7.0%)            | 0 (0.0%)                   | 30 (24.0%)           |
| N-Miss                                    | 1                 | 1                         | 0                   | 0                          | 2                    |
| <b>Insurance</b>                          |                   |                           |                     |                            |                      |
| Medicare/Private                          | 18 (90.0%)        | 26 (44.8%)                | 34 (79.1%)          | 2 (40.0%)                  | 80 (63.5%)           |
| Medicaid                                  | 2 (10.0%)         | 32 (55.2%)                | 9 (20.9%)           | 3 (60.0%)                  | 46 (36.5%)           |
| N-Miss                                    | 0                 | 1                         | 0                   | 0                          | 1                    |
| <b>Social Support</b>                     |                   |                           |                     |                            |                      |
| PROMIS ISS Q2 through Q4                  | 12 (60.0%)        | 41 (71.9%)                | 38 (90.5%)          | 5 (100.0%)                 | 96 (77.4%)           |
| PROMIS ISS Q1 (<30)                       | 8 (40.0%)         | 16 (28.1%)                | 4 (9.5%)            | 0 (0.0%)                   | 28 (22.6%)           |
| N-Miss                                    | 0                 | 2                         | 1                   | 0                          | 3                    |
| <b>Marital Status</b>                     |                   |                           |                     |                            |                      |
| Married                                   | 13 (65.0%)        | 23 (39.0%)                | 28 (65.1%)          | 4 (80.0%)                  | 68 (53.5%)           |

|                                                                                                                                                      | <b>ALD (N=20)</b> | <b>Hepatitis C (N=59)</b> | <b>MASLD (N=43)</b> | <b>Unknown/Other (N=5)</b> | <b>Total (N=127)</b> |
|------------------------------------------------------------------------------------------------------------------------------------------------------|-------------------|---------------------------|---------------------|----------------------------|----------------------|
| Not Married                                                                                                                                          | 7 (35.0%)         | 36 (61.0%)                | 15 (34.9%)          | 1 (20.0%)                  | 59 (46.5%)           |
| <b>Adherence</b>                                                                                                                                     |                   |                           |                     |                            |                      |
| Adherence Sum Q2 through Q4                                                                                                                          | 18 (94.7%)        | 42 (73.7%)                | 33 (76.7%)          | 5 (100.0%)                 | 98 (79.0%)           |
| Adherence Sum Q1 (<14)                                                                                                                               | 1 (5.3%)          | 15 (26.3%)                | 10 (23.3%)          | 0 (0.0%)                   | 26 (21.0%)           |
| N-Miss                                                                                                                                               | 1                 | 2                         | 0                   | 0                          | 3                    |
| <b>Substance Use</b>                                                                                                                                 |                   |                           |                     |                            |                      |
| No Recent Alcohol Use                                                                                                                                | 17 (85.0%)        | 39 (67.2%)                | 38 (88.4%)          | 5 (100.0%)                 | 99 (78.6%)           |
| Alcohol Use in Last 90 Days                                                                                                                          | 3 (15.0%)         | 19 (32.8%)                | 5 (11.6%)           | 0 (0.0%)                   | 27 (21.4%)           |
| N-Miss                                                                                                                                               | 0                 | 1                         | 0                   | 0                          | 1                    |
| <b>Total Cumulative Burden</b>                                                                                                                       |                   |                           |                     |                            |                      |
| Mean (SD)                                                                                                                                            | 2.9 (1.7)         | 4.6 (2.4)                 | 2.4 (1.7)           | 2.6 (2.4)                  | 3.5 (2.3)            |
| Median (Q1, Q3)                                                                                                                                      | 2.5 (2.0, 4.0)    | 5.0 (3.0, 6.0)            | 2.0 (1.0, 4.0)      | 2.0 (1.0, 4.0)             | 3.0 (2.0, 5.0)       |
| Range                                                                                                                                                | 1.0 - 7.0         | 0.0 - 11.0                | 0.0 - 6.0           | 0.0 - 6.0                  | 0.0 - 11.0           |
| Abbreviations: Social Deprivation Index (SDI), Patient-Reported Outcomes Measurement Information System (PROMIS), Brief health literacy score (BHLS) |                   |                           |                     |                            |                      |



Supplemental Table 3B. Cumulative Social Disadvantage and Components by Liver Disease Etiology

|                                           | ALD (N=20)  | HCV (N=59) | MASLD (N=43) | Total (N=122) | p-value |
|-------------------------------------------|-------------|------------|--------------|---------------|---------|
| <b>Education Attainment</b>               |             |            |              |               | 0.37    |
| High School Degree or Higher              | 17 (85.0%)  | 46 (78.0%) | 38 (88.4%)   | 101 (82.8%)   |         |
| Less than High School                     | 3 (15.0%)   | 13 (22.0%) | 5 (11.6%)    | 21 (17.2%)    |         |
| <b>BHLS</b>                               |             |            |              |               | 0.40    |
| Q2 through Q4                             | 17 (89.5%)  | 45 (76.3%) | 32 (74.4%)   | 94 (77.7%)    |         |
| Q1 (<7)                                   | 2 (10.5%)   | 14 (23.7%) | 11 (25.6%)   | 27 (22.3%)    |         |
| N-Miss                                    | 1           | 0          | 0            | 1             |         |
| <b>Disease Specific Knowledge</b>         |             |            |              |               | <0.001* |
| Correctly Self Reported Disease           | 0 (0.0%)    | 35 (66.0%) | 24 (61.5%)   | 59 (55.1%)    |         |
| Incorrectly Self Reported Disease         | 15 (100.0%) | 18 (34.0%) | 15 (38.5%)   | 48 (44.9%)    |         |
| N-Miss                                    | 5           | 6          | 4            | 15            |         |
| <b>Employment</b>                         |             |            |              |               | 0.002*  |
| Employed/Retired/Homemaker/Refused        | 14 (73.7%)  | 24 (40.7%) | 31 (72.1%)   | 69 (57.0%)    |         |
| Unemployed/SSI/Disability                 | 5 (26.3%)   | 35 (59.3%) | 12 (27.9%)   | 52 (43.0%)    |         |
| N-Miss                                    | 1           | 0          | 0            | 1             |         |
| <b>Income</b>                             |             |            |              |               | 0.001*  |
| \$15K or Greater                          | 15 (88.2%)  | 33 (58.9%) | 38 (90.5%)   | 86 (74.8%)    |         |
| Less than \$15K                           | 2 (11.8%)   | 23 (41.1%) | 4 (9.5%)     | 29 (25.2%)    |         |
| N-Miss                                    | 3           | 3          | 1            | 7             |         |
| <b>Income Adequacy</b>                    |             |            |              |               | 0.09    |
| Enough or Little Spare Money              | 15 (83.3%)  | 31 (56.4%) | 27 (69.2%)   | 73 (65.2%)    |         |
| Difficulty Paying Bills or No Spare Money | 3 (16.7%)   | 24 (43.6%) | 12 (30.8%)   | 39 (34.8%)    |         |
| N-Miss                                    | 2           | 4          | 4            | 10            |         |
| <b>Transportation</b>                     |             |            |              |               | 0.03*   |
| No Transportation Issues                  | 17 (85.0%)  | 53 (89.8%) | 43 (100.0%)  | 113 (92.6%)   |         |
| Transportation Issues                     | 3 (15.0%)   | 6 (10.2%)  | 0 (0.0%)     | 9 (7.4%)      |         |
| <b>Neighborhood Poverty</b>               |             |            |              |               | 0.001*  |
| SDI Q1 through Q3                         | 15 (78.9%)  | 35 (60.3%) | 40 (93.0%)   | 90 (75.0%)    |         |
| SDI Q4 (>85)                              | 4 (21.1%)   | 23 (39.7%) | 3 (7.0%)     | 30 (25.0%)    |         |
| N-Miss                                    | 1           | 1          | 0            | 2             |         |
| <b>Insurance</b>                          |             |            |              |               | <0.001* |
| Medicare/Private                          | 18 (90.0%)  | 26 (44.8%) | 34 (79.1%)   | 78 (64.5%)    |         |
| Medicaid                                  | 2 (10.0%)   | 32 (55.2%) | 9 (20.9%)    | 43 (35.5%)    |         |
| N-Miss                                    | 0           | 1          | 0            | 1             |         |
| <b>Social Support</b>                     |             |            |              |               | 0.02*   |
| PROMIS ISS Q2 through Q4                  | 12 (60.0%)  | 41 (71.9%) | 38 (90.5%)   | 91 (76.5%)    |         |
| PROMIS ISS Q1 (<30)                       | 8 (40.0%)   | 16 (28.1%) | 4 (9.5%)     | 28 (23.5%)    |         |
| N-Miss                                    | 0           | 2          | 1            | 3             |         |
| <b>Marital Status</b>                     |             |            |              |               | 0.02*   |
| Married                                   | 13 (65.0%)  | 23 (39.0%) | 28 (65.1%)   | 64 (52.5%)    |         |

|                                                                                                                                                                                                                                                                                        |                |                |                |                |         |
|----------------------------------------------------------------------------------------------------------------------------------------------------------------------------------------------------------------------------------------------------------------------------------------|----------------|----------------|----------------|----------------|---------|
| Not Married                                                                                                                                                                                                                                                                            | 7 (35.0%)      | 36 (61.0%)     | 15 (34.9%)     | 58 (47.5%)     |         |
| <b>Adherence</b>                                                                                                                                                                                                                                                                       |                |                |                |                | 0.15    |
| Adherence Sum Q2 through Q4                                                                                                                                                                                                                                                            | 18 (94.7%)     | 42 (73.7%)     | 33 (76.7%)     | 93 (78.2%)     |         |
| Adherence Sum Q1 (<14)                                                                                                                                                                                                                                                                 | 1 (5.3%)       | 15 (26.3%)     | 10 (23.3%)     | 26 (21.8%)     |         |
| N-Miss                                                                                                                                                                                                                                                                                 | 1              | 2              | 0              | 3              |         |
| <b>Substance Use</b>                                                                                                                                                                                                                                                                   |                |                |                |                | 0.03*   |
| No Recent Alcohol Use                                                                                                                                                                                                                                                                  | 17 (85.0%)     | 39 (67.2%)     | 38 (88.4%)     | 94 (77.7%)     |         |
| Alcohol Use in Last 90 Days                                                                                                                                                                                                                                                            | 3 (15.0%)      | 19 (32.8%)     | 5 (11.6%)      | 27 (22.3%)     |         |
| N-Miss                                                                                                                                                                                                                                                                                 | 0              | 1              | 0              | 1              |         |
| <b>Total Cumulative Burden</b>                                                                                                                                                                                                                                                         |                |                |                |                | <0.001* |
| Mean (SD)                                                                                                                                                                                                                                                                              | 2.9 (1.7)      | 4.6 (2.4)      | 2.4 (1.7)      | 3.6 (2.3)      |         |
| Median (Q1, Q3)                                                                                                                                                                                                                                                                        | 2.5 (2.0, 4.0) | 5.0 (3.0, 6.0) | 2.0 (1.0, 4.0) | 3.0 (2.0, 5.0) |         |
| Range                                                                                                                                                                                                                                                                                  | 1.0 - 7.0      | 0.0 - 11.0     | 0.0 - 6.0      | 0.0 - 11.0     |         |
| Abbreviations: Social Deprivation Index (SDI), Patient-Reported Outcomes Measurement Information System (PROMIS), Alcohol Associated Liver Disease (ALD), Hepatitis C virus (HCV) Metabolic Dysfunction-Associated Steatotic Liver Disease (MASLD), Brief health literacy score (BHLS) |                |                |                |                |         |
| *p-value<0.05                                                                                                                                                                                                                                                                          |                |                |                |                |         |

Supplemental Table 4. Cumulative Social Disadvantage and Components by Survival/Transplant Status

|                                           | Alive and Non Transplanted (N=69) | Transplanted (N=41) | Deceased No Transplant (N=29) | Total (N=139) | p-value |
|-------------------------------------------|-----------------------------------|---------------------|-------------------------------|---------------|---------|
| <b>Education Attainment</b>               |                                   |                     |                               |               | 0.17    |
| High School Degree or Higher              | 53 (76.8%)                        | 37 (90.2%)          | 25 (86.2%)                    | 115 (82.7%)   |         |
| Less than High School                     | 16 (23.2%)                        | 4 (9.8%)            | 4 (13.8%)                     | 24 (17.3%)    |         |
| <b>BHLS</b>                               |                                   |                     |                               |               | 0.10    |
| Q2 through Q4                             | 57 (82.6%)                        | 34 (85.0%)          | 19 (65.5%)                    | 110 (79.7%)   |         |
| Q1 (<7)                                   | 12 (17.4%)                        | 6 (15.0%)           | 10 (34.5%)                    | 28 (20.3%)    |         |
| N-Miss                                    | 0                                 | 1                   | 0                             | 1             |         |
| <b>Disease Specific Knowledge</b>         |                                   |                     |                               |               | 0.68    |
| Correctly Self Reported Disease           | 29 (51.8%)                        | 18 (47.4%)          | 13 (59.1%)                    | 60 (51.7%)    |         |
| Incorrectly Self Reported Disease         | 27 (48.2%)                        | 20 (52.6%)          | 9 (40.9%)                     | 56 (48.3%)    |         |
| N-Miss                                    | 13                                | 3                   | 7                             | 23            |         |
| <b>Employment</b>                         |                                   |                     |                               |               | 0.70    |
| Employed/Retired/Homemaker/Refused        | 38 (55.9%)                        | 26 (63.4%)          | 18 (62.1%)                    | 82 (59.4%)    |         |
| Unemployed/SSI/Disability                 | 30 (44.1%)                        | 15 (36.6%)          | 11 (37.9%)                    | 56 (40.6%)    |         |
| N-Miss                                    | 1                                 | 0                   | 0                             | 1             |         |
| <b>Income</b>                             |                                   |                     |                               |               | 0.05    |
| \$15K or Greater                          | 46 (68.7%)                        | 32 (84.2%)          | 24 (88.9%)                    | 102 (77.3%)   |         |
| Less than \$15K                           | 21 (31.3%)                        | 6 (15.8%)           | 3 (11.1%)                     | 30 (22.7%)    |         |
| N-Miss                                    | 2                                 | 3                   | 2                             | 7             |         |
| <b>Income Adequacy</b>                    |                                   |                     |                               |               | 0.38    |
| Enough or Little Spare Money              | 40 (63.5%)                        | 29 (76.3%)          | 18 (64.3%)                    | 87 (67.4%)    |         |
| Difficulty Paying Bills or No Spare Money | 23 (36.5%)                        | 9 (23.7%)           | 10 (35.7%)                    | 42 (32.6%)    |         |
| N-Miss                                    | 6                                 | 3                   | 1                             | 10            |         |
| <b>Transportation</b>                     |                                   |                     |                               |               | 0.77    |
| No Transportation Issues                  | 62 (89.9%)                        | 39 (95.1%)          | 27 (93.1%)                    | 128 (92.1%)   |         |
| Transportation Issues                     | 7 (10.1%)                         | 2 (4.9%)            | 2 (6.9%)                      | 11 (7.9%)     |         |
| <b>Neighborhood Poverty</b>               |                                   |                     |                               |               | 0.34    |
| SDI Q1 through Q3                         | 48 (70.6%)                        | 33 (82.5%)          | 23 (79.3%)                    | 104 (75.9%)   |         |
| SDI Q4 (>85)                              | 20 (29.4%)                        | 7 (17.5%)           | 6 (20.7%)                     | 33 (24.1%)    |         |
| N-Miss                                    | 1                                 | 1                   | 0                             | 2             |         |
| <b>Insurance</b>                          |                                   |                     |                               |               | 0.049*  |
| Medicare/Private                          | 37 (54.4%)                        | 31 (75.6%)          | 21 (72.4%)                    | 89 (64.5%)    |         |
| Medicaid                                  | 31 (45.6%)                        | 10 (24.4%)          | 8 (27.6%)                     | 49 (35.5%)    |         |
| N-Miss                                    | 1                                 | 0                   | 0                             | 1             |         |
| <b>Social Support</b>                     |                                   |                     |                               |               | 0.46    |
| PROMIS ISS Q2 through Q4                  | 50 (73.5%)                        | 34 (82.9%)          | 22 (81.5%)                    | 106 (77.9%)   |         |
| PROMIS ISS Q1 (<30)                       | 18 (26.5%)                        | 7 (17.1%)           | 5 (18.5%)                     | 30 (22.1%)    |         |
| N-Miss                                    | 1                                 | 0                   | 2                             | 3             |         |
| <b>Marital Status</b>                     |                                   |                     |                               |               | 0.04*   |
| Married                                   | 30 (43.5%)                        | 28 (68.3%)          | 17 (58.6%)                    | 75 (54.0%)    |         |
| Not Married                               | 39 (56.5%)                        | 13 (31.7%)          | 12 (41.4%)                    | 64 (46.0%)    |         |

|                                                                                                                                                      |                |                |                |                |       |
|------------------------------------------------------------------------------------------------------------------------------------------------------|----------------|----------------|----------------|----------------|-------|
| <b>Adherence</b>                                                                                                                                     |                |                |                |                | >0.99 |
| Adherence Sum Q2 through Q4                                                                                                                          | 52 (77.6%)     | 32 (78.0%)     | 22 (78.6%)     | 106 (77.9%)    |       |
| Adherence Sum Q1 (<14)                                                                                                                               | 15 (22.4%)     | 9 (22.0%)      | 6 (21.4%)      | 30 (22.1%)     |       |
| N-Miss                                                                                                                                               | 2              | 0              | 1              | 3              |       |
| <b>Substance Use</b>                                                                                                                                 |                |                |                |                | 0.03* |
| No Recent Alcohol Use                                                                                                                                | 48 (69.6%)     | 37 (90.2%)     | 23 (82.1%)     | 108 (78.3%)    |       |
| Alcohol Use in Last 90 Days                                                                                                                          | 21 (30.4%)     | 4 (9.8%)       | 5 (17.9%)      | 30 (21.7%)     |       |
| N-Miss                                                                                                                                               | 0              | 0              | 1              | 1              |       |
| <b>Total Cumulative Burden</b>                                                                                                                       |                |                |                |                | 0.01* |
| Mean (SD)                                                                                                                                            | 4.1 (2.6)      | 2.7 (1.9)      | 3.1 (1.7)      | 3.5 (2.3)      |       |
| Median (Q1, Q3)                                                                                                                                      | 4.0 (2.0, 6.0) | 2.0 (1.0, 4.0) | 3.0 (2.0, 4.0) | 3.0 (2.0, 5.0) |       |
| Range                                                                                                                                                | 0.0 - 11.0     | 0.0 - 8.0      | 0.0 - 6.0      | 0.0 - 11.0     |       |
| Abbreviations: Social Deprivation Index (SDI), Patient-Reported Outcomes Measurement Information System (PROMIS), Brief health literacy score (BHLS) |                |                |                |                |       |
| *p-value<0.05                                                                                                                                        |                |                |                |                |       |

**Supplemental Table 5: Univariable Analysis: Association between demographic, clinical, and SDOH with Survival**

| Predictor                                                                                 | Hazard Ratio Estimate | 95% Confidence Interval |      | p-value |
|-------------------------------------------------------------------------------------------|-----------------------|-------------------------|------|---------|
| Age at Diagnosis                                                                          | 1.01                  | 0.97                    | 1.06 | 0.58    |
| Sex (Female vs. Male)                                                                     | 0.91                  | 0.40                    | 2.08 | 0.83    |
| Race (Black vs. White)                                                                    | 0.18                  | 0.02                    | 1.44 | 0.11    |
| Ethnicity (Hispanic vs. Non-Hispanic)                                                     | 0.41                  | 0.06                    | 2.80 | 0.36    |
| Diagnosis BMI                                                                             | 1.04                  | 0.99                    | 1.10 | 0.11    |
| Charlson Total                                                                            | 1.16                  | 1.01                    | 1.32 | 0.04*   |
| MELD-Na                                                                                   | 1.08                  | 1.01                    | 1.16 | 0.03*   |
| BCLC (C/D vs. A/B)                                                                        | 1.92                  | 0.88                    | 4.23 | 0.10    |
| AFP Category (>=500 VS. <500)                                                             | 2.02                  | 0.85                    | 4.77 | 0.11    |
| Largest Tumor Size                                                                        | 1.02                  | 0.95                    | 1.10 | 0.56    |
| Education Attainment (Less than High School vs. High School+)                             | 0.81                  | 0.28                    | 2.29 | 0.69    |
| BHLS (Q1 vs. Q2/3/4)                                                                      | 2.54                  | 1.18                    | 5.46 | 0.02*   |
| Disease Specific Knowledge (Correct vs. Incorrect)                                        | 0.72                  | 0.31                    | 1.67 | 0.45    |
| Employment (Unemployed/SSI/Disability vs. Employed)                                       | 0.81                  | 0.39                    | 1.68 | 0.58    |
| Income (Less than \$15K vs. \$15K+)                                                       | 0.44                  | 0.13                    | 1.49 | 0.19    |
| Income Adequacy (Difficulty Paying Bills/No Spare Money vs. Enough or Little Spare Money) | 1.12                  | 0.52                    | 2.39 | 0.77    |
| Transportation (Transportation Issues vs. No Issues)                                      | 0.92                  | 0.21                    | 4.00 | 0.92    |
| Neighborhood Poverty (SDI Q4 vs. SDI Q1/2/3)                                              | 0.68                  | 0.30                    | 1.55 | 0.36    |
| Insurance (Medicaid vs. Medicare/Private)                                                 | 0.74                  | 0.33                    | 1.63 | 0.45    |
| Social Support (ISS Q1 vs. ISS Q2/3/4)                                                    | 0.86                  | 0.34                    | 2.14 | 0.74    |

|                                                       |      |      |      |      |
|-------------------------------------------------------|------|------|------|------|
| <b>Marital Status (Not Married vs. Married)</b>       | 0.83 | 0.41 | 1.68 | 0.60 |
| <b>Adherence (Adherence Q1 vs. Adherence Q 2/3/4)</b> | 0.83 | 0.36 | 1.89 | 0.65 |
| <b>Alcohol Use (Last 90 Days vs. No Recent Use)</b>   | 0.85 | 0.33 | 2.16 | 0.73 |
| <b>Total Cumulative Burden</b>                        | 0.93 | 0.81 | 1.07 | 0.30 |
| Abbreviations:<br>*p-value<0.05                       |      |      |      |      |

**Supplemental Table 6: Univariable Analysis: Association between demographic, clinical, and SDOH with LT among participants with BCLC stage 0-B disease at diagnosis**

| Predictor                                                                                 | Hazard Ratio | 95% Confidence Interval |             | p-value      |
|-------------------------------------------------------------------------------------------|--------------|-------------------------|-------------|--------------|
| Age at Diagnosis                                                                          | 1.02         | 0.98                    | 1.06        | 0.27         |
| Sex (Female vs. Male)                                                                     | 1.02         | 0.47                    | 2.23        | 0.96         |
| Race (Black vs. White)                                                                    | 0.44         | 0.16                    | 1.22        | 0.11         |
| Ethnicity (Hispanic vs. Non-Hispanic)                                                     | 1.13         | 0.35                    | 3.66        | 0.83         |
| CCI                                                                                       | 0.81         | 0.66                    | 0.99        | 0.04         |
| MELD-Na                                                                                   | 0.99         | 0.92                    | 1.07        | 0.86         |
| Education Attainment (Less than High School vs. High School+)                             | 0.59         | 0.21                    | 1.67        | 0.32         |
| BHLS (Q1 vs. Q2/3/4)                                                                      | 0.70         | 0.29                    | 1.71        | 0.44         |
| Disease Specific Knowledge (Incorrect vs. Correct)                                        | 1.08         | 0.54                    | 2.17        | 0.82         |
| Employment (Unemployed/SSI/Disability vs. Employed)                                       | 0.67         | 0.34                    | 1.33        | 0.25         |
| Income (Less than \$15K vs. \$15K+)                                                       | 0.65         | 0.26                    | 1.62        | 0.36         |
| Income Adequacy (Difficulty Paying Bills/No Spare Money vs. Enough or Little Spare Money) | 0.52         | 0.23                    | 1.19        | 0.12         |
| Transportation (Transportation Issues vs. No Issues)                                      | 0.28         | 0.04                    | 1.76        | 0.17         |
| Neighborhood Poverty (SDI Q4 vs. SDI Q1/2/3)                                              | 0.52         | 0.23                    | 1.17        | 0.11         |
| Insurance (Medicaid vs. Medicare/Private)                                                 | 0.67         | 0.32                    | 1.40        | 0.29         |
| Social Support (ISS Q1 vs. ISS Q2/3/4)                                                    | 0.74         | 0.31                    | 1.78        | 0.50         |
| Marital Status (Not Married vs. Married)                                                  | 0.56         | 0.28                    | 1.12        | 0.10         |
| Adherence (Adherence Q1 vs. Adherence Q 2/3/4)                                            | 1.17         | 0.52                    | 2.65        | 0.71         |
| Alcohol Use (Last 90 Days vs. No Recent Use)                                              | 0.35         | 0.10                    | 1.18        | 0.09         |
| <b>Total Cumulative Burden</b>                                                            | <b>0.82</b>  | <b>0.69</b>             | <b>0.97</b> | <b>0.02*</b> |
| Abbreviations: Brief Health Literacy (BHLS), Child Pugh Score (CPS)                       |              |                         |             |              |
| *p-value<0.05                                                                             |              |                         |             |              |
