# Supplementary figures and images for: Health literacy and cumulative social disadvantage are associated with survival and transplant in patients with hepatocellular carcinoma: a prospective study
Source: PubMed Central journal article supplement — BMJ Open Gastroenterol. 2024 Oct 2;11(1):e001537. doi: 10.1136/bmjgast-2024-001537 (PMC11448155; doi:10.1136/bmjgast-2024-001537), 2024-10-02

### Supplemental Figure 1. Study Enrollment

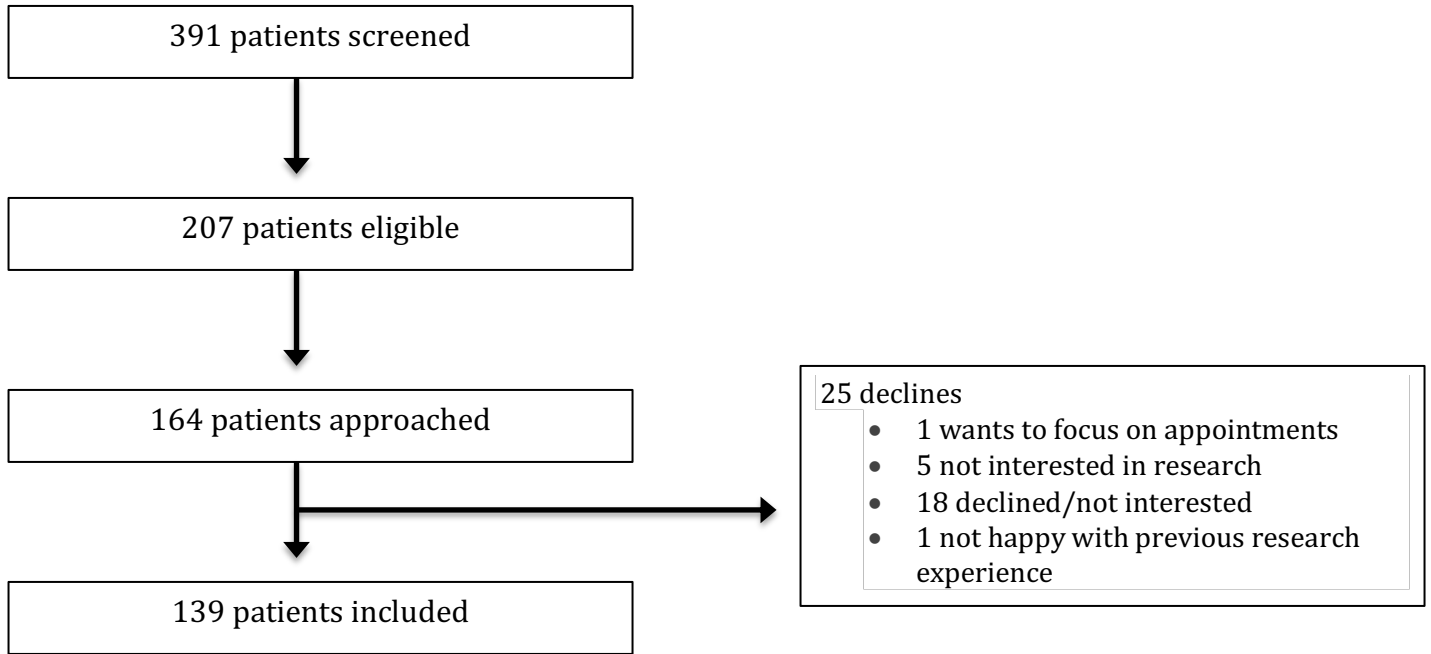

Supplement: bmjgast-11-1-s002.pdf [file bmjgast-11-1-s002.pdf]
